# Supplementary material for: Effect of Handler Knowledge of the Detection Task on Canine Search Behavior and Performance
Source: Front Vet Sci. 2020 May 27;7:250. doi: 10.3389/fvets.2020.00250 (PMC7266931; doi:10.3389/fvets.2020.00250)
Supplement: Supplementary file 2 [file Table_2.XLSX]

## Sheet: Summary
ID	Event	Section
1A	HIT	D
1A	HIT	S
1A	HIT	1
1A	FALSE	2
1A	MISS	2
1A	FALSE	3
1B2	HIT	D
1B2	HIT	S
1B2	MISS	1
1B2	MISS	2
1B2	CORRECT	3
2A	FALSE	D
2A	MISS	D
2A	HIT	S
2A	MISS	1
2A	HIT	2
2A	FALSE	3
2B	FALSE	D
2B	HIT	S
2B	MISS	1
2B	HIT	2
2B	CORRECT	3
3A1	HIT	D
3A1	HIT	S
3A1	HIT	1
3A1	HIT	2
3A1	FALSE	3
3B	HIT	D
3B	FALSE	S
3B	HIT	S
3B	HIT	1
3B	FALSE	2
3B	HIT	2
3B	CORRECT	3
4A	HIT	D
4A	HIT	S
4A	MISS	1
4A	HIT	2
4A	FALSE	3
4A	FALSE	3
4A	FALSE	3
4B	MISS	D
4B	FALSE	D
4B	FALSE	D
4B	HIT	S
4B	HIT	1
4B	HIT	2
4B	FALSE	3
4B	FALSE	3
5A	HIT	D
5A	HIT	S
5A	FALSE	1
5A	HIT	1
5A	MISS	2
5A	CORRECT	3
5B	HIT	D
5B	HIT	S
5B	FALSE	S
5B	HIT	1
5B	HIT	2
5B	CORRECT	3
6A	FALSE	D
6A	FALSE	D
6A	HIT	D
6A	FALSE	S
6A	HIT	S
6A	HIT	1
6A	FALSE	1
6A	FALSE	1
6A	FALSE	2
6A	HIT	2
6A	FALSE	3
6A	FALSE	3
6A	FALSE	3
6B	HIT	1
6B	FALSE	1
6B	FALSE	1
6B	FALSE	2
6B	FALSE	2
6B	MISS	2
6B	CORRECT	3
6B	HIT	S
6B	FALSE	S
6B	FALSE	S
6B	HIT	D
7A	FALSE	1
7A	FALSE	1
7A	MISS	1
7A	FALSE	2
7A	MISS	2
7A	CORRECT	3
7A	FALSE	S
7A	FALSE	S
7A	MISS	S
7A	FALSE	D
7A	HIT	D
7B	HIT	1
7B	MISS	2
7B	FALSE	3
7B	HIT	S
7B	HIT	D
8A	FALSE	1
8A	MISS	1
8A	FALSE	2
8A	FALSE	2
8A	MISS	2
8A	FALSE	3
8A	FALSE	S
8A	HIT	D
8B	FALSE	1
8B	FALSE	1
8B	FALSE	1
8B	MISS	1
8B	FALSE	2
8B	FALSE	2
8B	MISS	2
8B	CORRECT	3
8B	HIT	S
8B	FALSE	S
8B	HIT	D
8B	FALSE	D
8B	FALSE	D
9A	MISS	1
9A	FALSE	2
9A	MISS	2
9A	FALSE	3
9A	FALSE	S
9A	MISS	S
9A	HIT	D
9B	FALSE	1
9B	FALSE	1
9B	MISS	1
9B	FALSE	2
9B	MISS	2
9B	FALSE	3
9B	FALSE	S
9B	MISS	S
9B	FALSE	D
9B	HIT	D
10A	HIT	1
10A	MISS	2
10A	FALSE	3
10A	HIT	S
10A	HIT	D
10B	FALSE	1
10B	FALSE	1
10B	MISS	1
10B	FALSE	2
10B	MISS	2
10B	FALSE	3
10B	FALSE	S
10B	FALSE	S
10B	MISS	S
10B	HIT	D
11A	HIT	1
11A	MISS	2
11A	FALSE	3
11A	FALSE	S
11A	FALSE	S
11A	FALSE	S
11A	MISS	S
11A	HIT	D
11B	FALSE	1
11B	FALSE	1
11B	HIT	1
11B	FALSE	1
11B	FALSE	2
11B	MISS	2
11B	FALSE	3
11B	FALSE	3
11B	HIT	S
11B	HIT	D
12A	FALSE	1
12A	HIT	1
12A	MISS	2
12A	FALSE	3
12A	HIT	S
12A	FALSE	S
12A	FALSE	D
12A	HIT	D
12A	FALSE	D
12A	FALSE	D
12B	HIT	1
12B	MISS	2
12B	CORRECT	3
12B	HIT	S
12B	FALSE	S
12B	HIT	D
13A	HIT	1
13A	FALSE	2
13A	FALSE	2
13A	FALSE	2
13A	MISS	2
13A	CORRECT	3
13A	FALSE	S
13A	HIT	S
13A	FALSE	S
13A	HIT	D
13B	FALSE	1
13B	HIT	1
13B	FALSE	2
13B	MISS	2
13B	FALSE	2
13B	FALSE	2
13B	FALSE	2
13B	CORRECT	3
13B	FALSE	S
13B	FALSE	S
13B	MISS	S
13B	FALSE	D
13B	FALSE	D
13B	MISS	D
14A	HIT	S
14A	HIT	D
14A	HIT	1
14A	HIT	2
14A	CORRECT	3
14B	HIT	D
14B	HIT	S
14B	HIT	1
14B	HIT	2
14B	FALSE	3
15A	HIT	D
15A	HIT	S
15A	HIT	1
15A	MISS	2
15A	FALSE	3
15B	HIT	S
15B	HIT	D
15B	FALSE	1
15B	HIT	1
15B	HIT	2
15B	FALSE	3
15B	FALSE	3
15B	FALSE	3
16A	HIT	S
16A	HIT	D
16A	HIT	1
16A	HIT	2
16A	CORRECT	3
16B	HIT	D
16B	HIT	S
16B	HIT	1
16B	HIT	2
16B	CORRECT	3
17A	FALSE	S
17A	HIT	S
17A	MISS	D
17A	FALSE	1
17A	HIT	1
17A	HIT	2
17A	CORRECT	3
17B	HIT	S
17B	HIT	D
17B	FALSE	D
17B	HIT	1
17B	HIT	2
17B	CORRECT	3
18A	HIT	S
18A	FALSE	S
18A	HIT	D
18A	HIT	1
18A	HIT	2
18A	CORRECT	3
18B	HIT	S
18B	HIT	D
18B	HIT	1
18B	MISS	2
18B	CORRECT	3
19A	MISS	D
19A	FALSE	D
19A	MISS	S
19A	FALSE	S
19A	HIT	1
19A	FALSE	1
19A	HIT	2
19A	FALSE	3
19B	HIT	D
19B	HIT	S
19B	HIT	1
19B	FALSE	1
19B	HIT	2
19B	FALSE	3
19B	FALSE	3
19B	FALSE	3
19B	FALSE	3
19B	FALSE	3
19B	FALSE	3
20A	MISS	D
20A	MISS	S
20A	HIT	1
20A	FALSE	2
20A	HIT	2
20A	CORRECT	3
20B	HIT	S
20B	HIT	D
20B	HIT	1
20B	HIT	2
20B	FALSE	3
21A	HIT	S
21A	MISS	D
21A	MISS	1
21A	HIT	2
21A	FALSE	3
21B	HIT	S
21B	FALSE	S
21B	HIT	D
21B	FALSE	D
21B	HIT	1
21B	HIT	2
21B	CORRECT	3
22A	HIT	S
22A	FALSE	S
22A	MISS	D
22A	HIT	1
22A	MISS	2
22A	FALSE	3
22A	FALSE	3
22B	HIT	S
22B	HIT	D
22B	HIT	1
22B	HIT	2
22B	CORRECT	3
23A	HIT	S
23A	HIT	D
23A	FALSE	D
23A	HIT	1
23A	FALSE	1
23A	FALSE	1
23A	HIT	2
23A	CORRECT	3
24A	MISS	1
24A	MISS	2
24A	CORRECT	3
24B	MISS	2
24B	FALSE	2
24B	MISS	1
24B	MISS	1
24B	MISS	2
24B	FALSE	3
25A	HIT	1
25A	MISS	2
25A	CORRECT	3
25B	MISS	1
25B	HIT	2
25B	CORRECT	3
26A	HIT	1
26A	MISS	2
26A	FALSE	3
26B	HIT	1
26B	MISS	2
26B	CORRECT	3
27A	HIT	1
27A	HIT	2
27A	CORRECT	3
27A	HIT	S
27A	HIT	D
27B	HIT	S
27B	FALSE	D
27B	HIT	D
27B	FALSE	1
27B	MISS	1
27B	HIT	2
27B	CORRECT	3
28A	HIT	1
28A	HIT	2
28A	CORRECT	3
28A	FALSE	S
28A	MISS	S
28A	HIT	D
28B	MISS	1
28B	HIT	2
28B	FALSE	3
28B	FALSE	S
28B	HIT	D
29A	HIT	1
29A	HIT	2
29A	FALSE	3
29A	HIT	S
29A	FALSE	S
29A	HIT	D
29B	HIT	S
29B	FALSE	S
29B	HIT	D
29B	MISS	1
29B	HIT	2
29B	CORRECT	3
30A	MISS	S
30A	HIT	D
30A	FALSE	1
30A	MISS	1
30A	HIT	2
30A	CORRECT	3
30B	FALSE	1
30B	HIT	1
30B	HIT	2
30B	FALSE	3
30B	HIT	S
30B	HIT	D

## Sheet: IOA
ID	Area	Behavior	Person_one	Person_two
17A	D	Investigate	1.429	0.25
15A	2	Investigate	9.505	2
13B	2	Investigate	19.273	11.814
13B	S	Investigate	8.254	4.518
18B	2	Investigate	15.245	21.272
10B	1	investigate	3.704	1.001
10B	2	investigate	2.452	1.233
10B	S	investigate	3.009	2.271
20A	S	investigate	2.255
20A	D	Investigate	2.255	1.999
21A	1	investigate	1.746	2.251
21A	D	investigate	1.255	3.252
12A	2	investigate	0.501	0.499
12B	2	investigate	1.493	0.251
13A	2	investigate	1.738	1
18B	2	investigate	9.751	8.249
21A	1	investigate	2.766	0.764
10B	1	investigate	2.502	2.246
10B	2	investigate	2.578	1.499
14B	1	Lookback	2	1
14B	2	Lookback	2	1
14B	3	Lookback	1	2
14B	S	Lookback	2	2
14B	D	Lookback	1	1
17A	1	Lookback	5	5
17A	2	Lookback	1	1
17A	3	Lookback	2	2
17A	S	Lookback	4	6
17A	D	Lookback	2	3
15A	1	Lookback	2	1
15A	2	Lookback	1	1
15A	3	Lookback	1	1
15A	S	Lookback	1	1
15A	D	Lookback	2	1
16B	1	Lookback	3	2
16B	2	Lookback	1	2
16B	3	Lookback	1	1
16B	S	Lookback	4	3
16B	D	Lookback	3	4
18A	1	Lookback	3	5
18A	2	Lookback	1	1
18A	S	Lookback	3	3
18A	D	Lookback	4	4
13B	1	Lookback	3	1
13B	2	Lookback	19	22
13B	3	Lookback	5	3
13B	S	Lookback	4	4
13B	D	Lookback	4	2
18B	1	lookback	1	1
18B	2	lookback	1	1
18B	3	lookback	1	2
18B	S	lookback	1	2
18B	D	Lookback	0	2
10B	1	lookback	5	4
10B	2	lookback	5	6
10B	3	lookback	2	2
10B	S	lookback	6	4
10B	D	lookback	3	2
20A	2	lookback	8	2
20A	3	lookback	2	2
20A	S	lookback	5	6
20A	D	lookback	5	1
21A	3	lookback	5	9
10A		Nontarget	0.987	0.501
10B		Nontarget	0.75	0.487
10B		Nontarget	1.409	1.01
11A		Nontarget	2.002	1.993
11B		Nontarget	5.994	2.167
12A		Nontarget	1.496	0.503
12B		Nontarget	0.515	1.493
13A		Nontarget	1.509	0.995
13B		Nontarget	4.993	1.238
15A		Nontarget	1.498	0.593
18B		Nontarget	0.491	1.01
1A		Nontarget	17.135	2.751
1B2		Nontarget	5.497	4.74
1B2		Nontarget	8.497	3.751
2A		Nontarget	13.003	4.254
2B		Nontarget	9.245	8.734
4A		Nontarget	1.504	1.502
5A		Nontarget	0.253	0.489
6B		Nontarget	3.759	4.147
7A		Nontarget	2.014	1.505
7A		Nontarget	1.49	0.755
7B		Nontarget	1.003	1.03
8A		Nontarget	1.754	2.245
8A		Nontarget	1.254	1.993
8B		Nontarget	1.336	1.034
8B		Nontarget	2.752	1.019
9A		Nontarget	0.999	0.256
9A		Nontarget	1.494	1.25
9B		Nontarget	2.737	3.759
9B		Nontarget	1.016	0.885
21A		Nontarget	3.255	1.994
14B	3	Start_false	56.518	55.511
17A	1	Start_false	13.997	13.757
17A	S	Start_false	38.409	40.006
15A	3	Start_false	48.497	47.033
18A	S	Start_false	84.247	79.25
13B	1	Start_false	6.428	158.404
13B	2	Start_false	313.007	312.366
13B	S	Start_false	59.85	59.502
13B	D	Start_false	88.468	88.815
10B	1	Start_false	10.273	9.517
10B	2	Start_false	6.841	7.624
10B	3	Start_false	36.031	36.257
10B	S	Start_false	17.521	9.015
20A	2	Start_false	79.502	81.738
21A	3	Start_false	105.258	105.755
14B	1	Start_hit	9.997	10.75
14B	2	Start_hit	18.996	20.251
14B	S	Start_hit	27.252	29.248
14B	D	Start_hit	21.769	21.516
17A	1	Start_hit	38.504	38.762
17A	2	Start_hit	12.506	19.492
17A	S	Start_hit	50.502	52.541
15A	1	Start_hit	9.504	10.249
15A	S	Start_hit	37.25	37.996
15A	D	Start_hit	15.004	14.999
16B	1	Start_hit	15.99	16.997
16B	2	Start_hit	8.753	9.75
16B	S	Start_hit	9.516	10
16B	D	Start_hit	7.495	7.526
18A	1	Start_hit	13.255	17
18A	2	Start_hit	7.756	7.748
18A	S	Start_hit	46.255	45.313
18A	D	Start_hit	25.509	26.326
18B	1	Start_hit	12.431	12.98
18B	S	Start_hit	8.529	9.022
18B	D	Start_hit	12.251	12.751
10B	D	Start_hit	6.746	9.593
20A	1	Start_hit	52.015	52.486
21A	2	Start_hit	13.751	13.5
21A	S	Start_hit	14.759	15.502
14B	1	Total	32.241	32.237
14B	2	Total	40.997	42.767
14B	3	Total	82.24	82.123
14B	S	Total	66.77	68.541
14B	D	Total	30.758	31.024
17A	1	Total	50.251	49.795
17A	2	Total	26.772	27.293
17A	3	Total	23.502	28.496
17A	S	Total	65.247	65.977
17A	D	Total	22.259	21.087
15A	1	Total	17.503	16.976
15A	2	Total	26.49	29.288
15A	3	Total	53.691	51.031
15A	S	Total	46.254	46.006
15A	D	Total	55.504	24.516
16B	1	Total	30.503	28.741
16B	2	Total	28.007	28.502
16B	3	Total	30.234	30.825
16B	S	Total	33.762	33.544
16B	D	Total	30.761	29.75
18A	1	Total	47.759	48.253
18A	2	Total	18.999	20.019
18A	3	Total	38.231	38.864
18A	S	Total	97.76	98.5
18A	D	Total	38.506	42.787
13B	1	Total	79.161	84.501
13B	2	Total	400.842	421.574
13B	3	Total	169.748	170.296
13B	S	Total	145.755	148.528
13B	D	Total	166.831	167.141
18B	1	Total	27.766	30.254
18B	2	Total	68.003	69.247
18B	3	Total	86.501	88.729
18B	S	Total	30.013	29.291
18B	D	Total	41.257	41.535
10B	1	total	50.253	47.236
10B	2	Total	37.604	36.285
10B	3	Total	42.994	44.385
10B	S	Total	54.762	56.271
10B	D	Total	32.755	36.37
20A	1	Total	61.255	62.743
20A	2	Total	122.501	132.491
20A	3	Total	60.493	63.688
20A	S	Total	129.495	122.317
20A	D	Total	122.002	121.282
21A	1	Total	62.464	67.496
21A	2	Total	27.5	28.083
21A	3	Total	110.488	113.838
21A	S	Total	31.741	31.214
21A	D	Total	51.248	53.989

## Sheet: False vs Hit duration
ID	Category	Group	FALSE	Hit	Area	Years Experience	Blank	Double	City
1A	Professional	A		37.983	1	0.75	5	5	1
1A	Professional	A	45.004		2	0.75	5	5	1
2A	Professional	A		155.25	2	5	2	4	1
2B	Professional	B		60.009	2	0.58	6	2	1
3A1	Professional	A		43.247	1	0.13	3	4	1
3A1	Professional	A		19.495	2	0.13	3	4	1
3B	Professional	B		56.456	1	0.19	3	4	1
3B	Professional	B	13.738		2	0.19	3	4	1
4A	Sport	A		34.616	2	0.5	2	4	1
4B	Sport	B		102.26	1	4	2	5	1
4B	Sport	B		65.007	2	4	2	5	1
5A	Sport	A	44.243		1	2.33	1	5	1
5B	Sport	B		14.506	1	5	3	4	1
5B	Sport	B		16.496	2	5	3	4	1
6A	Sport	A		20.504	1	1	3	5	1
6A	Sport	A	74.506		2	1	3	5	1
6B	Sport	B		24.659	1	2.5	2	5	2
6B	Sport	B	35.001		2	2.5	2	5	2
7A	Sport	A	24.986		1	1.5	2	5	2
7A	Sport	A	110.7		2	1.5	2	5	2
7B	Sport	B		5.509	1		4	5	2
8A	Sport	A	65.013		1	2	3	5	2
8A	Sport	A	31.996		2	2	3	5	2
8B	Sport	B	44		1	1	2	5	2
8B	Sport	B	107.8		2	1	2	5	2
9A	Sport	A	45.998		2	6	2	5	2
9B	Sport	B	26.503		1	1.5	2	1	2
9B	Sport	B	20.51		2	1.5	2	1	2
10A	Sport	A		15.254	1	4	2	5	2
10B	Sport	B	10.273		1	2	2	5	2
10B	Sport	B	6.841		2	2	2	5	2
11A	Sport	A		20.753	1	1	1	5	2
11B	Sport	B	35.517		1	5	2	5	2
11B	Sport	B	42.498		2	5	2	5	2
12A	Sport	A	26.255		1	1	3	5	2
12B	Sport	B		11.003	1	6	4	5	2
13A	Sport	A		5.496	1	2	1	5	2
13A	Sport	A	8.507		2	2	1	5	2
13B	Sport	B	6.428		1	2.5	3	5	2
13B	Sport	B	101.8		2	2.5	3	5	2
14A	Sport	A		15	1	0.83	2	5	3
14A	Sport	A		12.173	2	0.83	2	5	3
14B	Sport	B		9.997	1	1.5	1	4	3
14B	Sport	B		18.996	2	1.5	1	4	3
15A	Sport	A		9.504	1	4.5	2	4	3
15B	Sport	B	14.751		1	1	1	5	3
15B	Sport	B		18.819	2	1	1	5	3
16A	Sport	A		21.004	1	11	3	5	3
16A	Sport	A		38.757	2	11	3	5	3
16B	Sport	B		15.999	1	7	3	5	3
16B	Sport	B		8.753	2	7	3	5	3
17A	Sport	A	13.997		1	3	3	5	3
17A	Sport	A		12.506	2	3	3	5	3
17B	Sport	B		11.517	1	4.5	5	5	3
17B	Sport	B		15	2	4.5	5	5	3
18A	Sport	A		13.255	1	0.07	3	5	3
18A	Sport	A		7.756	2	0.07	3	5	3
18B	Sport	B		12.431	1	8	2	5	3
19A	Sport	A		109.752	1	0.5	6	1	4
19A	Sport	A		31.497	2	0.5	6	1	4
19B	Sport	B		34.524	1	6	1	5	4
19B	Sport	B		13.996	2	6	1	5	4
20A	Sport	A		52.015	1	2	3	5	4
20A	Sport	A	79.502		2	2	3	5	4
20B	Sport	B		22.241	1	2.5	2	4	4
20B	Sport	B		11.497	2	2.5	2	4	4
21A	Sport	A		13.497	2	3.5	5	5	4
21B	Sport	B		5	1	2	2	2	4
21B	Sport	B		15.258	2	2	2	2	4
22A	Sport	A		7.007	1	0.5	1	5	4
22B	Sport	B		28.498	1	5	1	5	4
22B	Sport	B		18.243	2	5	1	5	4
23A	Sport	A		5.766	1	1	1	2	4
23A	Sport	A		13.006	2	1	1	2	4
24B	Professional	B	124.993		2	7	4	4	5
25A	Professional	A		85.001	1	3	3	2	5
25B	Professional	B		65.503	2	2	3	4	5
26A	Professional	A		73.004	1	2	5	5	5
26B	Professional	B		42.765	1	3.5	3	4	5
27A	Professional	A		37.501	1	1	6	3	6
27A	Professional	A		14.248	2	1	6	3	6
27B	Professional	B	24.252		1	2.5	5	5	7
27B	Professional	B		29.003	2	2.5	5	5	7
28A	Professional	A		18.25	1	2	5	5	7
28A	Professional	A		13.498	2	2	5	5	7
28B	Professional	B		24.758	2	0.16	6	5	7
29A	Professional	A		32.485	1	0.16	5	4	7
29A	Professional	A		30.503	2	0.16	5	4	7
29B	Professional	B		24.498	2	4.5	6	4	7
30A	Professional	A		58.495	1	0.5	6	5	7
30A	Professional	A		38.007	2	0.5	6	5	7
30B	Professional	B		53.752	1	4.5	5	5	7
30B	Professional	B		24.242	2	4.5	5	5	7

## Sheet: Odor expectation in 3
ID	Category	Group	Handler Belief	Years Experience	Blank	Double	City
1A	Professional	A	4	0.75	5	5	1
2A	Professional	A	6	0.41	2	4	1
3A1	Professional	A	4	0.13	3	4	1
1B2	Professional	B		0.5		2	1
2B	Professional	B	7	0.58	6	2	1
3B	Professional	B	6	0.19	3	4	1
10A	Sport	A	4	4	2	5	2
11A	Sport	A	7	1	1	5	2
12A	Sport	A	7	1	3	5	2
13A	Sport	A	7	2	1	5	2
14A	Sport	A	7	0.83	2	5	3
15A	Sport	A	7	4.5	2	4	3
16A	Sport	A	2	11	3	5	3
17A	Sport	A	7	3	3	5	3
18A	Sport	A	4	0.07	3	5	3
4A	Sport	A	7	0.5	2	4	1
5A	Sport	A	6	2.33	1	5	1
6A	Sport	A	6	1	3	5	1
7A	Sport	A	4	1.5	2	5	2
9A	Sport	A	6	6	2	5	2
8A	Sport	A	4	2	3	4	2
10B	Sport	B	5	2	2	5	2
11B	Sport	B	7	5	2	5	2
12B	Sport	B	4	6	4	5	2
13B	Sport	B	4	2.5	3	5	2
14B	Sport	B	4	1.5	1	4	3
15B	Sport	B	7	1	1	5	3
16B	Sport	B	6	7	3	5	3
17B	Sport	B	4	4.5	5	5	3
18B	Sport	B	4	8	2	5	3
4B	Sport	B	7	4	2	5	1
5B	Sport	B	5	5	3	4	1
6B	Sport	B	5	2.5	2	5	2
7B	Sport	B	6		4	5	2
8B	Sport	B	4	1	2	5	2
9B	Sport	B	4	1.5	2	1	2
19A	Sport	A	7	0.5	6	1	4
19B	Sport	B	7	6	1	5	4
20A	Sport	A	7	2	3	5	4
20B	Sport	B	6	2.5	2	4	4
21A	Sport	A	4	3.5	5	5	4
21B	Sport	B	4	2	2	2	4
22A	Sport	A	6	0.5	1	5	4
22B	Sport	B	6	5	1	5	4
23A	Sport	A	4	1	1	2	4
23B	Sport	B	7	2.5	2	4	4
24A	Professional	A	4	1.5	2	4	5
24B	Professional	B	6	7	4	4	5
25A	Professional	A	2	3	3	2	5
25B	Professional	B	7	2	3	4	5
26A	Professional	A	7	2	5	5	5
26B	Professional	B	4	3.5	3	4	5
27A	Professional	A	4	1	6	3	6
27B	Professional	B	4	2.5	5	5	7
28A	Professional	A	6	2	5	5	7
28B	Professional	B	1	0.16	5	5	7
29A	Professional	A	4	0.16	5	4	7
29B	Professional	B	4	4.5	6	4	7
30A	Professional	A	1	0.5	6	5	7
30B	Professional	B	2	4.5	5	5	7

## Sheet: Investigate vs miss
ID	Group	Category	Investigate	Nontarget	Area	Years Experience	Blank	Double	City
10A	A	Sport	0	0.501	2	4	2	5	2
10B	B	Sport	3.704	0.487	1	2	2	5	2
10B	B	Sport	2.452	1.01	2	2	2	5	2
11A	A	Sport	4.7	1.993	2	1	1	5	2
11B	B	Sport	3.499	2.167	2	5	2	5	2
12A	A	Sport	0.501	0.503	2	1	3	5	2
12B	B	Sport	5.001	1.493	2	6	4	5	2
13A	A	Sport	1.738	0.995	2	2	1	5	2
13B	B	Sport	19.273	1.238	2	2.5	3	5	2
15A	A	Sport	9.505	0.593	2	4.5	2	4	3
15B	B	Sport	0	1.004	1	1	1	5	3
18B	B	Sport	15.245	1.01	2	8	2	5	3
1A	A	Professional	25.503	2.751	2	0.75	5	5	1
1B2	B	Professional	5.021	4.74	1	0.5		2	1
1B2	B	Professional	8.763	3.751	2	0.5		2	1
2A	A	Professional	51.753	4.254	1	5	2	4	1
2B	B	Professional	3.974	8.734	1	0.58	6	2	1
4A	A	Sport	4.001	1.502	1	0.5	2	4	1
5A	A	Sport	4.748	0.489	2	2.33	1	5	1
6B	B	Sport	2.528	4.147	2	2.5	2	5	2
7A	A	Sport	8.013	1.505	1	1.5	2	5	2
7A	A	Sport	1.483	0.755	2	1.5	2	5	2
7B	B	Sport	0.743	1.03	2		4	5	2
8A	A	Sport	3.007	2.245	1	2	3		2
8A	A	Sport	3.525	1.993	2	2	3		2
8B	B	Sport	0.999	1.034	1	1	2		2
8B	B	Sport	5.507	1.019	2	1	2		2
9A	A	Sport	1.506	0.256	1	6	2	5	2
9A	A	Sport	1.5	1.25	2	6	2	5	2
9B	B	Sport	5.951	3.759	1	1.5	2	1	2
9B	B	Sport	1.505	0.885	2	1.5	2	1	2
21A	A	Sport	1.746	1.994	1	3.5	5	5	4
22A	A	Sport	1.507	0.5	2	0.5	1	5	4
24A	A	Professional	3.502	1.501	1	1.5	2	4	5
24A	A	Professional	11.263	2.492	2	1.5	2	4	5
24B	B	Professional	4.761	1.003	1	7	4	4	5
24B	B	Professional	29.449	0.5	2	7	4	4	5
25A	A	Professional	1.737	0.613	2	3	3	2	5
25B	B	Professional	6.52	0.988	1	2	3	4	5
26A	A	Professional	0	1	2	2	5	5	5
26B	B	Professional	2.26	0	2	3.5	3	4	5
27B	B	Professional	5.508	0.498	1	2.5	5	5	7
29B	B	Professional	8.748	1.992	1	4.5	6	4	7
30A	A	Professional	5	0.403	1	0.5	6	5	7

## Sheet: Lookback in area 3
ID	Category	Group	Lookback 1	Lookback 2	Lookback 3	Years Experience	Blank	Double	City
1A	Professional	A	3	6	4	0.75	5	5	1
2A	Professional	A	0	3	4	5	2	4	1
3A1	Professional	A	2	1	0	0.13	3	4	1
1B2	Professional	B	1	0	0	0.5		2	1
2B	Professional	B	0	3	1	0.58	6	2	1
3B	Professional	B	4	8	2	0.19	3	4	1
10A	Sport	A	2	0	8	4	2	5	2
11A	Sport	A	1	5	7	1	1	5	2
12A	Sport	A	1	0	2	1	3	5	2
13A	Sport	A	2	8	4	2	1	5	2
14A	Sport	A	1	1	1	0.83	2	5	3
15A	Sport	A	2	1	1	4.5	2	4	3
16A	Sport	A	3	2	0	11	3	5	3
17A	Sport	A	5	1	2	3	3	5	3
18A	Sport	A	3	1	0	0.07	3	5	3
4A	Sport	A	5	3	3	0.5	2	4	1
5A	Sport	A	2	0	1	2.33	1	5	1
6A	Sport	A	18	16	15	1	3	5	1
7A	Sport	A	4	3	1	1.5	2	5	2
9A	Sport	A	1	1	2	6	2	5	2
8A	Sport	A	3	6	2	2	3	4	2
10B	Sport	B	5	5	2	2	2	5	2
11B	Sport	B	13	21	17	5	2	5	2
12B	Sport	B	2	1	1	6	4	5	2
13B	Sport	B	3	19	5	2.5	3	5	2
14B	Sport	B	1	2	1	1.5	1	4	3
15B	Sport	B	3	7	26	1	1	5	3
16B	Sport	B	3	1	1	7	3	5	3
17B	Sport	B	1	1	0	4.5	5	5	3
18B	Sport	B	1	1	1	8	2	5	3
4B	Sport	B	2	13	11	4	2	5	1
5B	Sport	B	3	5	2	5	3	4	1
6B	Sport	B	8	7	10	2.5	2	5	2
7B	Sport	B	1	1	1		4	5	2
8B	Sport	B	9	13	23	1	2	5	2
9B	Sport	B	3	2	4	1.5	2	1	2
19A	Sport	A	12	1	8	0.5	6	1	4
19B	Sport	B	3	1	23	6	1	5	4
20A	Sport	A	0	8	2	2	3	5	4
20B	Sport	B	1	1	15	2.5	2	4	4
21A	Sport	A	1	0	5	3.5	5	5	4
21B	Sport	B	1	1	1	2	2	2	4
22A	Sport	A	0	0	1	0.5	1	5	4
22B	Sport	B	0	1	2	5	1	5	4
23A	Sport	A	5	1	0	1	1	2	4
24A	Professional	A	0	3	0	1.5	2	4	5
24B	Professional	B	3	1	2	7	4	4	5
25A	Professional	A	0	1	0	3	3	2	5
25B	Professional	B	0	2	0	2	3	4	5
26A	Professional	A	0	0	1	2	5	5	5
26B	Professional	B	0	0	0	3.5	3	4	5
27A	Professional	A	0	0	0	1	6	3	6
27B	Professional	B	0	0	0	2.5	5	5	7
28A	Professional	A	0	0	0	2	5	5	7
28B	Professional	B	0	0	0	0.16	5	5	7
29A	Professional	A	0	0	0	0.16	5	4	7
29B	Professional	B	0	0	0	4.5	6	4	7
30A	Professional	A	0	0	0	0.5	6	5	7
30B	Professional	B	0	0	0	4.5	5	5	7

## Sheet: Single vs Double
ID	Category	Group	SingleArea	DoubleArea	Years Experience	Blank	Double	City
1A	Professional	A	1	1	0.75	5	5	1
2A	Professional	A	1	0	5	2	4	1
3A1	Professional	A	1	1	0.13	3	4	1
1B2	Professional	B	1	1	0.5		2	1
2B	Professional	B	1	0	0.58	6	2	1
3B	Professional	B	1	1	0.19	3	4	1
10A	Sport	A	1	1	4	2	5	2
11A	Sport	A	0	1	1	1	5	2
12A	Sport	A	1	1	1	3	5	2
13A	Sport	A	1	1	2	1	5	2
14A	Sport	A	1	1	0.83	2	5	3
15A	Sport	A	1	1	4.5	2	4	3
16A	Sport	A	1	1	11	3	5	3
17A	Sport	A	1	0	3	3	5	3
18A	Sport	A	1	0	0.07	3	5	3
4A	Sport	A	1	1	0.5	2	4	1
5A	Sport	A	1	1	2.33	1	5	1
6A	Sport	A	1	1	1	3	5	1
7A	Sport	A	0	1	1.5	2	5	2
9A	Sport	A	0	1	6	2	5	2
8A	Sport	A	0	1	2	3	4	2
10B	Sport	B	0	1	2	2	5	2
11B	Sport	B	1	1	5	2	5	2
12B	Sport	B	1	1	6	4	5	2
13B	Sport	B	0	0	2.5	3	5	2
14B	Sport	B	1	1	1.5	1	4	3
15B	Sport	B	1	1	1	1	5	3
16B	Sport	B	1	1	7	3	5	3
17B	Sport	B	1	1	4.5	5	5	3
18B	Sport	B	1	1	8	2	5	3
4B	Sport	B	1	0	4	2	5	1
5B	Sport	B	1	1	5	3	4	1
6B	Sport	B	1	1	2.5	2	5	2
7B	Sport	B	1	1		4	5	2
8B	Sport	B	1	1	1	2	5	2
9B	Sport	B	0	1	1.5	2	1	2
19A	Sport	A	0	0	0.5	6	1	4
19B	Sport	B	1	1	6	1	5	4
20A	Sport	A	0	0	2	3	5	4
20B	Sport	B	1	1	2.5	2	4	4
21A	Sport	A	1	0	3.5	5	5	4
21B	Sport	B	1	1	2	2	2	4
22A	Sport	A	1	0	0.5	1	5	4
22B	Sport	B	1	1	5	1	5	4
23A	Sport	A	1	1	1	1	2	4
27A	Professional	A	1	1	1	6	3	6
27B	Professional	B	1	0	2.5	5	5	7
28A	Professional	A	0	1	2	5	5	7
28B	Professional	B	0	1	0.16	5	5	7
29A	Professional	A	0	1	0.16	5	4	7
29B	Professional	B	0	1	4.5	6	4	7
30A	Professional	A	1	1	0.5	6	5	7
30B	Professional	B	1	1	4.5	5	5	7

## Sheet: False in area 3
ID	Category	Group	False	Years Experience	Blank	Double	City
1A	Professional	A	1	0.75	5	5	1
2A	Professional	A	1	5	2	4	1
3A1	Professional	A	1	0.13	3	4	1
1B2	Professional	B	0	0.5		2	1
2B	Professional	B	0	0.58	6	2	1
3B	Professional	B	0	0.19	3	4	1
10A	Sport	A	1	4	2	5	2
11A	Sport	A	1	1	1	5	2
12A	Sport	A	1	1	3	5	2
13A	Sport	A	0	2	1	5	2
14A	Sport	A	0	0.83	2	5	3
15A	Sport	A	1	4.5	2	4	3
16A	Sport	A	0	11	3	5	3
17A	Sport	A	0	3	3	5	3
18A	Sport	A	0	0.07	3	5	3
4A	Sport	A	3	0.5	2	4	1
5A	Sport	A	0	2.33	1	5	1
6A	Sport	A	3	1	3	5	1
7A	Sport	A	0	1.5	2	5	2
9A	Sport	A	1	6	2	5	2
8A	Sport	A	1	2	3	4	2
10B	Sport	B	1	2	2	5	2
11B	Sport	B	2	5	2	5	2
12B	Sport	B	0	6	4	5	2
13B	Sport	B	0	2.5	3	5	2
14B	Sport	B	1	1.5	1	4	3
15B	Sport	B	3	1	1	5	3
16B	Sport	B	0	7	3	5	3
17B	Sport	B	0	4.5	5	5	3
18B	Sport	B	0	8	2	5	3
4B	Sport	B	2	4	2	5	1
5B	Sport	B	0	5	3	4	1
6B	Sport	B	0	2.5	2	5	2
7B	Sport	B	1		4	5	2
8B	Sport	B	0	1	2	5	2
9B	Sport	B	1	1.5	2	1	2
19A	Sport	A	1	0.5	6	1	4
19B	Sport	B	6	6	1	5	4
20A	Sport	A	0	2	3	5	4
20B	Sport	B	1	2.5	2	4	4
21A	Sport	A	1	3.5	5	5	4
21B	Sport	B	0	2	2	2	4
22A	Sport	A	2	0.5	1	5	4
22B	Sport	B	0	5	1	5	4
23A	Sport	A	0	1	1	2	4
24A	Professional	A	0	1.5	2	4	5
24B	Professional	B	1	7	4	4	5
25A	Professional	A	0	3	3	2	5
25B	Professional	B	0	2	3	4	5
26A	Professional	A	1	2	5	5	5
26B	Professional	B	0	3.5	3	4	5
27A	Professional	A	0	1	6	3	6
27B	Professional	B	0	2.5	5	5	7
28A	Professional	A	0	2	5	5	7
28B	Professional	B	1	0.16	5	5	7
29A	Professional	A	1	0.16	5	4	7
29B	Professional	B	0	4.5	6	4	7
30A	Professional	A	0	0.5	6	5	7
30B	Professional	B	1	4.5	5	5	7

## Sheet: Area 3 duration A vs B
Category	ID	Group	Duration1	Duration2	Duration3	Years Experience	Blank	Double	City
Professional	1A	A	48.491	167.25	83.233	0.75	5	5	1
Professional	2A	A	131.754	185.751	98.259	0.41	2	4	1
Professional	3A1	A	52.803	22.24	40.761	0.13	3	4	1
Professional	26A	A	91.999	190.755	204.759	2	5	5	5
Professional	24A	A	187.736	280.741	117.233	1.5	2	4	5
Professional	25A	A	98.005	214.498	83.985	3	3	2	5
Professional	1B2	B	52.511	79.741	39.674	0.5		2	1
Professional	2B	B	82.25	62.745	103.261	0.58	6	2	1
Professional	3B	B	104.764	164.451	41.772	0.19	3	4	1
Professional	24B	B	207.535	586.482	356.997	7	4	4	5
Professional	25B	B	109.004	82.494	169.929	2	3	4	5
Professional	26B	B	126.775	109.745	77.989	3.5	3	4	5
Sport	10A	A	25.023	15.487	115.743	4	2	5	2
Sport	11A	A	25.775	73.334	83.275	1	1	5	2
Sport	12A	A	39.25	8.77	55.997	1	3	5	2
Sport	13A	A	30.582	54.03	59.74	2	1	5	2
Sport	14A	A	39.493	28.005	27.499	0.83	2	5	3
Sport	15A	A	17.503	26.49	53.691	4.5	2	4	3
Sport	16A	A	50.483	45.981	18.308	11	3	5	3
Sport	17A	A	50.251	26.772	23.502	3	3	5	3
Sport	18A	A	47.759	18.999	38.231	0.07	3	5	3
Sport	4A	A	82.988	42.856	54.667	0.5	2	4	1
Sport	5A	A	75.009	31.494	54.306	2.33	1	5	1
Sport	6A	A	215.751	99.241	157.75	1	3	5	1
Sport	7A	A	74.75	138.255	167.744	1.5	2	5	2
Sport	9A	A	41.562	51.002	21.275	6	2	5	2
Sport	8A	A	67.515	93.73	75.757	2	3	4	2
Sport	19A	A	155.749	38.007	190.001	0.5	6	1	4
Sport	20A	A	61.255	129.495	60.493	2	3	5	4
Sport	21A	A	62.464	27.5	110.488	3.5	5	5	4
Sport	22A	A	23.745	12.494	74	0.5	1	5	4
Sport	23A	A	57.746	21.508	11.498	1	1	2	4
Sport	10B	B	50.253	37.604	43.994	2	2	5	2
Sport	11B	B	77.5	177.519	162.3	5	2	5	2
Sport	12B	B	42.757	34.496	49.61	6	4	5	2
Sport	13B	B	79.161	400.842	169.748	2.5	3	5	2
Sport	14B	B	32.241	40.997	82.24	1.5	1	4	3
Sport	15B	B	32.518	50.244	257.518	1	1	5	3
Sport	16B	B	30.503	28.007	30.234	7	3	5	3
Sport	17B	B	38.264	45.561	31.978	4.5	1	5	3
Sport	18B	B	27.766	68.003	86.501	8	2	5	3
Sport	4B	B	134.501	122.015	128.5	4	2	5	1
Sport	5B	B	51.753	76.999	73.513	5	3	4	1
Sport	6B	B	105.997	104.295	238.747	2.5	2	5	2
Sport	7B	B	27.998	35.983	25.75		4	5	2
Sport	8B	B	71.557	196.354	190.236	1	2	5	2
Sport	9B	B	110.758	68.754	75.998	1.5	2	1	2
Sport	19B	B	40.773	21.002	231.536	6	1	5	4
Sport	20B	B	50.991	39.49	229.984	2.5	2	4	4
Sport	21B	B	28.491	21.244	44.994	2	2	2	4
Sport	22B	B	40.992	25.245	53.999	5	1	5	4
Professional	27A	A	48.270	20.001	53.350	1	6	3	6
Professional	27B	B	65.750	34.507	141.259	2.5	5	5	7
Professional	28A	A	47.014	16.497	86.653	2	5	5	7
Professional	28B	B	71.252	32.001	217.752	0.16	5	5	7
Professional	29A	A	42.747	34.645	245.850	0.16	5	4	7
Professional	29B	B	56.741	41.019	131.501	4.5	6	4	7
Professional	30A	A	90.495	51.998	126.002	0.5	6	5	7
Professional	30B	B	189.952	33.255	126.976	4.5	5	5	7
